# Supplementary material for: Aspartame and Phe-Containing Degradation Products in Soft Drinks across Europe
Source: PubMed Central journal article supplement (PMC7353418; doi:10.3390/nu12061887), 2020-06-24
Supplement: nutrients-12-01887-s001.pdf [file nutrients-12-01887-s001.pdf]

## Supplementary

**Table S1.** Carry-over experiment for aspartame and its degradation products.

|                      | APM    | Phe  | DKP  | Asp-Phe |
|----------------------|--------|------|------|---------|
| Mean sample low (L)  | 226.6  | 1.9  | 0.0  | 24.8    |
| Mean sample high (H) | 1882.0 | 1.7  | 60.3 | 136.7   |
| Mean L-L             | 226.8  | 1.9  | 0.0  | 24.7    |
| Mean L-H             | 226.0  | 1.8  | 0.0  | 24.7    |
| 3*SD L-L             | 23.80  | 0.63 | 0.00 | 1.21    |
| Difference L-L - L-H | 0.75   | 0.08 | 0.00 | 0.05    |
| Carry over           | No     | *    | No   | No      |

Concentrations in  $\mu\text{mol/L}$ . APM; Aspartame, Phe; phenylalanine, DKP; diketopiperazine, Asp-Phe; aspartylphenylalanine The mean and standard deviation of sample low after sample low (L-L: L2, L5, L6 en L7) and sample low after sample high (L-H: L3, L4, L8, L9 en L10) were calculated. Carry-over was considered present when mean L-H – mean L-L  $< 3^* \text{SD}$  of L-L. \* Carry-over of Phe could not be calculated from these samples, as mean sample high was similar to mean sample low.



|                              |                         |                               |      |      |      |     |      |           |
|------------------------------|-------------------------|-------------------------------|------|------|------|-----|------|-----------|
| Group C                      | <b>C</b>                | Sprite (low in sugar)         | ES   | 351  | 0.01 | 22  | 28   | 401       |
|                              |                         | Sprite Lemon Lime & Cactus    | NL   | 676  | 2    | 15  | 33   | 726       |
|                              |                         | Sprite Lemon Lime & Cranberry | NL   | 716  | 2    | 19  | 34   | 770       |
|                              |                         | Sprite No Sugar               | BE   | 786  | 0    | 21  | 37   | 843       |
|                              |                         | Sprite No Sugar               | DK   | 773  | 0    | 27  | 43   | 842       |
|                              |                         |                               |      |      |      |     |      | 716 (183) |
|                              | <b>A</b>                | Coca Cola                     | TR   | 0    | 0    | 0   | 0    | 0         |
|                              |                         | Coca Cola                     | FI   | 0    | 0    | 0   | 0    | 0         |
|                              |                         |                               |      |      |      |     |      | 0 (0)     |
|                              | <b>B</b>                | Coca Cola Light               | BE   | 792  | 0    | 20  | 47   | 858       |
|                              |                         | Coca Cola Light               | NL   | 740  | 2    | 14  | 50   | 805       |
|                              |                         | Coca Cola Light               | SE   | 726  | 0    | 19  | 54   | 799       |
|                              |                         | Coca Cola Light               | DE   | 235  | 3    | 20  | 90   | 348       |
|                              |                         | Coca Cola Light Exotic Mango  | SE   | 630  | 2    | 39  | 81   | 750       |
|                              |                         | Coca Cola Light Exotic Mango  | DE   | 506  | 7    | 45  | 129  | 687       |
|                              |                         | Coca Cola Light Exotic Mango  | NL   | 502  | 6    | 28  | 136  | 672       |
|                              |                         | Coca Cola Light Ginger Lime   | NL   | 630  | 4    | 21  | 115  | 770       |
|                              |                         | Coca Cola Light Ginger Lime   | DE   | 267  | 3    | 22  | 76   | 368       |
|                              |                         |                               |      |      |      |     |      |           |
|                              | <b>C</b>                | Coca Cola Zero Sugar          | BE   | 1255 | 0.04 | 40  | 63   | 1359      |
| Coca Cola Zero Sugar         |                         | FR                            | 1275 | 0    | 28   | 47  | 1350 |           |
| Coca Cola Zero Sugar         |                         | DK                            | 1180 | 0.7  | 30   | 104 | 1314 |           |
| Coca Cola Zero Sugar         |                         | GB                            | 1085 | 4    | 71   | 140 | 1300 |           |
| Coca Cola Zero Sugar         |                         | FI                            | 1018 | 4    | 63   | 102 | 1186 |           |
| Coca Cola Zero Sugar         |                         | NL                            | 1074 | 2    | 23   | 59  | 1157 |           |
| Coca Cola Zero Sugar         |                         | ES                            | 389  | 0    | 10   | 22  | 422  |           |
| Coca Cola Zero Sugar         |                         | DE                            | 151  | 12   | 47   | 100 | 310  |           |
| Coca Cola Zero Sugar         |                         | TR                            | 0    | 0    | 0    | 0   | 0    |           |
| Coca Cola Zero Sugar Lemon   |                         | BE                            | 739  | 0.2  | 29   | 53  | 821  |           |
| Coca-Cola Zero Sugar Cherry  |                         | NL                            | 730  | 0.9  | 7    | 27  | 766  |           |
| Coca-Cola Zero Sugar Lemon   |                         | NL                            | 786  | 0.8  | 8    | 28  | 823  |           |
| Coca-Cola Zero Sugar Vanilla |                         | NL                            | 770  | 1    | 10   | 32  | 813  |           |
|                              |                         |                               |      |      |      |     |      | 894 (439) |
| <b>D</b>                     |                         | Pepsi Max Cherry No Sugar     | FI   | 1310 | 26   | 184 | 331  | 1850      |
|                              | Pepsi Max Lime No Sugar | FI                            | 1480 | 15   | 145  | 228 | 1867 |           |
|                              | Pepsi Max No Sugar      | GB                            | 1640 | 7    | 111  | 198 | 1955 |           |
|                              | Pepsi Max No Sugar      | SE                            | 1410 | 21   | 156  | 318 | 1905 |           |
|                              | Pepsi Max No Sugar      | FI                            | 1530 | 9    | 114  | 203 | 1856 |           |

|                                            |                                     |                            |      |     |     |     | 1887 (44)  |     |
|--------------------------------------------|-------------------------------------|----------------------------|------|-----|-----|-----|------------|-----|
| <b>E</b>                                   | Pepsi Max Zero Caffeine Zero Sugar  | BE                         | 1500 | 13  | 112 | 222 | 1847       |     |
|                                            | Pepsi Max Zero Sugar                | DE                         | 1790 | 3   | 64  | 156 | 2013       |     |
|                                            | Pepsi Max Zero Sugar                | BE                         | 1670 | 4   | 64  | 159 | 1897       |     |
|                                            | Pepsi Max Zero Sugar                | NL                         | 1635 | 7   | 86  | 164 | 1892       |     |
|                                            | Pepsi Max Zero Sugar Cherry         | BE                         | 1270 | 30  | 166 | 319 | 1784       |     |
|                                            | Pepsi Max Zero Sugar Cherry Flavour | NL                         | 1760 | 6   | 65  | 161 | 1991       |     |
|                                            | Pepsi Max Zero Sugar Ginger Flavour | NL                         | 1580 | 12  | 107 | 221 | 1920       |     |
|                                            | Pepsi Max Zero Sugar Lemon          | BE                         | 1260 | 2   | 46  | 80  | 1388       |     |
|                                            | Pepsi Max Zero Sugar Lemon Flavour  | NL                         | 1180 | 7   | 68  | 114 | 1369       |     |
|                                            |                                     |                            |      |     |     |     | 1789 (243) |     |
|                                            | <b>A</b>                            | Aquarius Zero Sugar Orange | ES   | 130 | 0   | 4   | 15         | 148 |
|                                            |                                     | Bullit Sugar Free          | NL   | 557 | 2   | 29  | 30         | 618 |
| Bullit Sugar Free Citrus Splash            |                                     | NL                         | 385  | 5   | 45  | 52  | 486        |     |
| Bullit Sugarfree Full Berry                |                                     | NL                         | 363  | 6   | 48  | 52  | 470        |     |
| Diet Pepsi                                 |                                     | GB                         | 999  | 3   | 68  | 96  | 1166       |     |
| Dr Pepper                                  |                                     | GB                         | 356  | 0   | 18  | 47  | 420        |     |
| Dr Pepper                                  |                                     | FI                         | 0    | 0   | 0   | 0   | 0          |     |
| Freeway Cola Zero                          |                                     | FI                         | 280  | 5   | 40  | 93  | 418        |     |
| Freeway Cola Zero Sugar                    |                                     | NL                         | 405  | 1   | 2   | 26  | 434        |     |
| Golden Power Energy Drink met Taurine Zero |                                     | NL                         | 504  | 2   | 26  | 34  | 565        |     |
| Hero Cassis Zero                           |                                     | NL                         | 247  | 3   | 1   | 16  | 267        |     |
| Highway Cassis                             |                                     | NL                         | 451  | 4   | 20  | 39  | 514        |     |
| Highway Cola                               |                                     | NL                         | 101  | 2   | 0.2 | 33  | 136        |     |
| Highway Cola Light                         |                                     | NL                         | 596  | 14  | 74  | 141 | 825        |     |
| Highway Lemon Lime                         |                                     | NL                         | 116  | 0.9 | 5   | 16  | 137        |     |
| Highway Orange                             |                                     | NL                         | 226  | 2   | 16  | 26  | 271        |     |
| Irn-Bru                                    |                                     | GB                         | 412  | 0   | 24  | 45  | 481        |     |
| Jaffa Ananas Sokeriton                     |                                     | FI                         | 1085 | 10  | 109 | 128 | 1332       |     |
| Jaffa Appelsiini                           |                                     | FI                         | 0    | 1   | 0   | 0   | 1          |     |
| Jaffa Appelsiini                           |                                     | FI                         | 0    | 1   | 0   | 0   | 1          |     |
| Jaffa Appelsiini Sokeriton                 |                                     | FI                         | 1340 | 4   | 49  | 61  | 1455       |     |
| Jaffa Lime-Verigreippi Sokeriton           |                                     | FI                         | 302  | 2   | 18  | 27  | 349        |     |
| Jaffa Vesimeloni-Vadelma Sokeriton         |                                     | FI                         | 725  | 0   | 23  | 37  | 784        |     |

|                                            |    |      |     |     |     |           |
|--------------------------------------------|----|------|-----|-----|-----|-----------|
| Jumbo Cola Coconut Flavour 0% Sugar        | NL | 667  | 4   | 34  | 57  | 762       |
| Jumbo Cola Light                           | NL | 405  | 24  | 94  | 146 | 667       |
| Jumbo Cola Zero Sugar                      | NL | 119  | 2   | 31  | 51  | 1269      |
| Jumbo Cola Zero Sugar Cherry Taste         | NL | 456  | 6   | 32  | 77  | 570       |
| K Menu Cola Light                          | FI | 1525 | 12  | 123 | 272 | 1931      |
| Look Cola Zero                             | FR | 1630 | 3   | 60  | 119 | 1813      |
| Lucozade Energy                            | GB | 286  | 0   | 12  | 24  | 322       |
| Mountain Dew                               | FI | 0    | 0   | 0   | 0   | 0         |
| Nestea No Sugar Lemon                      | ES | 173  | 0   | 6   | 15  | 194       |
| Pepsi                                      | FI | 0    | 0   | 0   | 0   | 0         |
| Red Bull Sugarfree                         | NL | 552  | 3   | 40  | 46  | 641       |
| Red Bull Sugarfree                         | ES | 549  | 1   | 48  | 36  | 634       |
| Red Bull Zero Callories                    | NL | 451  | 2   | 21  | 29  | 503       |
| Redbull Zero Sugar                         | SE | 423  | 0.1 | 32  | 42  | 497       |
| Ribena Light Blackcurrant                  | GB | 734  | 0.5 | 38  | 55  | 827       |
| River Cola Zero                            | NL | 1020 | 5   | 49  | 113 | 1187      |
| Royal Club Tonic with a Hint of Grapefruit | NL | 103  | 1   | 1   | 14  | 119       |
|                                            |    |      |     |     |     | 580 (484) |

APM; aspartame, Phe; phenylalanine, DKP; diketopiperazine, Asp-phe; aspartylphenylalanine, NL; Netherlands, BE; Belgium, FI; Finland, FR; France, TR; Turkey, DE; Germany, GB; England, ES; Spain, DK; Denmark, SE; Sweden.
